FOCUS PAPER

# Nitric oxide signalling in plants: interplays with $\text{Ca}^{2+}$ and protein kinases

Cécile Courtois<sup>1,\*</sup>, Angélique Besson<sup>1,\*</sup>, Jennifer Dahan<sup>1</sup>, Stéphane Bourque<sup>1</sup>, Grazyna Dobrowolska<sup>2</sup>, Alain Pugin<sup>1</sup> and David Wendehenne<sup>1,†</sup>

<sup>1</sup> *Unité Mixte de Recherche INRA 1088/CNRS 5184/Université de Bourgogne, Plante-Microbe-Environnement, 17 rue Sully, BP 86510, F-21065 Dijon cedex, France*

<sup>2</sup> *Institute of Biochemistry and Biophysics, Polish Academy of Sciences, 02-106 Warsaw, Poland*

Received 14 June 2007; Revised 23 July 2007; Accepted 26 July 2007

## Abstract

Much attention has been paid to nitric oxide (NO) research since its discovery as a physiological mediator of plant defence responses. In recent years, newer roles have been attributed to NO, ranging from root development to stomatal closure. The molecular mechanisms underlying NO action in plants are just begun to emerge. The currently available data illustrate that NO can directly influence the activity of target proteins through nitrosylation and has the capacity to act as a  $\text{Ca}^{2+}$ -mobilizing intracellular messenger. The interplay between NO and  $\text{Ca}^{2+}$  has important functional implications, expanding and enriching the possibilities for modulating transduction processes. Furthermore, protein kinases regulated through NO-dependent mechanisms are being discovered, offering fresh perspective on processes such as stress tolerance.

Key words:  $\text{Ca}^{2+}$ , cADPR, nitric oxide, protein kinases, signalling, SnRK2.

## Introduction

If one lists the number of cellular processes under the control of NO in animals, the physiological importance of NO becomes immediately apparent. NO was reported to play pivotal roles in synaptic transmission, vasodilatation, erection, egg fertilization, defence against pathogenic micro-organisms, and apoptosis (Schmidt and Walter, 1994). Exactly how NO exerts such diversity of functions is the subject of intense study. An increasing body of

evidence indicates that NO, and derived species such as peroxynitrite ( $\text{ONOO}^-$ ), exert part of their biological activities by chemical modification of protein targets (Bogdan, 2001). These include the nitrosylation, nitrosation, nitration, and oxidation of proteins (Bogdan *et al.*, 2000). In particular, nitrosylation, that is the direct binding of an NO group to a transition metal or cysteine residues (Mannick and Schonhoff, 2002), is emerging as an important post-translational modification of proteins. More than 100 proteins have been found to undergo reversible regulation by nitrosylation *in vitro* and/or *in vivo* (Hanafy *et al.*, 2001; Stamler *et al.*, 2001). Remarkably, the broad spectrum of functions ascribed to proteins found to be nitrosylated affects essentially all major cellular activities, highlighting the multifunctional roles of NO (Stamler *et al.*, 2001). Furthermore, nitrosylation is one of the molecular strategies used for signalling (Hess *et al.*, 2005). Accordingly, through nitrosylation, NO was shown to regulate key signalling-related proteins including the soluble guanylate cyclase (sGC), the small GTP-binding protein p21ras, and a number of  $\text{Ca}^{2+}$ -permeable channels (Mannick and Schonhoff, 2002). Furthermore, NO-dependent regulation of protein kinase activities occurs by nitrosylation of the kinases themselves or by modulation of interacting/upstream factors such as cGMP,  $\text{Ca}^{2+}$ , p21ras or protein phosphatases (Beck *et al.*, 1999). It is worth realizing that the analysis of the cross-talk operating between NO, protein kinases, and the second messengers  $\text{Ca}^{2+}$  and cGMP provided a framework for understanding the molecular bases of major physiological processes, such as egg fertilization or modulation of neuronal excitability (Willmott *et al.*, 1996; Ahern *et al.*, 2002).

\* Joint first author.

† To whom correspondence should be addressed. E-mail: wendehen@dijon.inra.fr

The past few years have seen an increasing number of studies dedicated to NO functions in plants. NO appears to be involved in plant developmental processes and participates in a number of physiological processes such as stomatal closure, flowering, response to environmental stresses, and cell death (for reviews see Lamattina *et al.*, 2003; Wendehenne *et al.*, 2004; Delledonne, 2005; Lamotte *et al.*, 2005). Understanding of the mechanisms by which NO contributes to these processes is still in its infancy, but promising results are being obtained. Notably, the identification of NO target proteins and genes whose expression is regulated by NO has already borne fruit, indicating that NO can directly influence the activity of plant proteins as well as the signalling cascade leading to gene expression (Lindermayr *et al.*, 2005, 2006; Grun *et al.*, 2006; Belenghi *et al.*, 2007). These observations also paved the way for research into NO involvement in plant signalling. This article focuses on advances in the characterization of NO signalling activities in plants with respect to its cross-talk with  $\text{Ca}^{2+}$  and protein kinases.

### Interplay of NO and $\text{Ca}^{2+}$

$\text{Ca}^{2+}$  is well established as a universal intracellular second messenger (Sanders *et al.*, 2002; Petersen *et al.*, 2005). Notably, increases in cytosolic free  $\text{Ca}^{2+}$  concentration ( $[\text{Ca}^{2+}]_{\text{cyt}}$ ) have been detected in response to a wide range of environmental, developmental, and growth stimuli (Lecourieux *et al.*, 2006). According to the 'Ca<sup>2+</sup> signature hypothesis', each stimulus induces  $\text{Ca}^{2+}$  transients which have unique temporal and spatial arrangements determining the specificity of the physiological response (Scrase-Field and Knight, 2003). The changes in  $[\text{Ca}^{2+}]_{\text{cyt}}$  are decoded and relayed through  $\text{Ca}^{2+}$  sensors such as calmodulins (CaMs), CDPKs (Ca<sup>2+</sup>-Dependent Protein Kinases) or annexins (Berridge *et al.*, 2003). Interestingly, recent progress on animal cells have highlighted that, similarly to  $\text{Ca}^{2+}$  signalling, NO signalling might display spatial and temporal organization (Stamler *et al.*, 2001). Accordingly, several NO-signalling components such as  $\text{Ca}^{2+}$ -permeable channels, p21ras, sGC, and MAPKs (Mitogen-Activated Protein Kinases) are organized into macromolecular complexes in which NO signalling functions within highly localized environments (Kone *et al.*, 2003). The complementary aspect of NO and  $\text{Ca}^{2+}$  signalling is reinforced by the occurrence of transduction networks in which  $\text{Ca}^{2+}$  acts both as a promoter and a sensor of NO signalling (Clementi, 1998). In plants, concomitant changes in  $[\text{Ca}^{2+}]_{\text{cyt}}$  and NO levels are apparent during the transduction of biotic and abiotic signals (Garcia-Mata *et al.*, 2003; Gould *et al.*, 2003; Lamotte *et al.*, 2004; Vandelle *et al.*, 2006). As reported in animal cells, growing evidence suggest that these two messengers may interact in subtle ways.

### $\text{Ca}^{2+}$ -dependence of NO synthesis

Current reports show that there are at least two main enzymatic routes for NO synthesis in plants: a nitrite-dependent pathway and a L-arginine-dependent pathway. The nitrite pathway mainly involves nitrate reductase (NR) which catalyses the NAD(P)H reduction of nitrite to NO (Yamasaki *et al.*, 1999), and a root-specific plasma membrane-bound nitrite reductase not identified yet (Stöhr *et al.*, 2001). NR is the only enzyme whose NO-producing activity has been rigorously confirmed both *in vivo* and *in vitro*. A question that still arises is whether the NR-derived NO can act as a signal or whether it is just the product of an enzyme side reaction (Desikan *et al.*, 2002; Meyer *et al.*, 2005; Bright *et al.*, 2006; Crawford, 2006; Modolo *et al.*, 2006). Whatever scenario, no functional link between  $\text{Ca}^{2+}$  and NR-mediated NO synthesis has been reported so far. The L-arginine-dependent pathway is based principally on the assumption that plants do possess nitric oxide synthase (NOS)-like enzyme(s). In animals, NOSs catalyse the conversion of L-arginine to L-citrulline and NO. Activities of the constitutive isoforms of mammalian NOSs (cNOSs) are strictly CaM/ $\text{Ca}^{2+}$ -dependent (Bogdan, 2001). During the past decade, there has been an increasing number of reports showing the presence of NOS activity in plants and a candidate catalysing a L-arginine-dependent NO synthesis has been identified (Guo *et al.*, 2003). However, its ability to catalyse NO synthesis has been questioned and a mechanism for L-arginine-dependent NO synthesis in plants is still unknown (Crawford *et al.*, 2006; Zemojtel *et al.*, 2006). Interestingly, plant NOS activity measured in several plant species and various tissues requires  $\text{Ca}^{2+}$  and CaM as cofactors, suggesting that  $\text{Ca}^{2+}$  or  $\text{Ca}^{2+}$ -bound CaM might directly interact with the plant NOS-like enzyme (Delledonne *et al.*, 1998; Modolo *et al.*, 2002; Corpas *et al.*, 2004, 2006; del Rio *et al.*, 2004). The importance of  $\text{Ca}^{2+}$  in L-arginine-dependent NO synthesis is further supported by experiments showing that elicitor-induced NO synthesis in tobacco and grapevine cells was suppressed by pharmacological agents that inhibit mammalian NOS activities and increases in  $[\text{Ca}^{2+}]_{\text{cyt}}$  (Lamotte *et al.*, 2004; Vandelle *et al.*, 2006). In agreement with these findings, in a recent study by Ali *et al.* (2007) genetic evidence has been provided that lipopolysaccharide-induced NO synthesis, which was found to be suppressed by mammalian NOS inhibitors, is controlled by an upstream  $\text{Ca}^{2+}$  influx mediated by the plasma membrane  $\text{Ca}^{2+}$ -permeable channel cyclic-nucleotide-gated channel (CNGC)2. In addition, NO synthesis catalysed by NOS-like-enzyme(s) was shown to be up-regulated by  $\text{H}_2\text{O}_2$ -, SA- (salicylic acid), and aldehyde-induced elevations of  $[\text{Ca}^{2+}]_{\text{cyt}}$  in various plant species and phytoplankton populations (Lum *et al.*, 2002; Allen *et al.*, 2006; Zottini *et al.*, 2007). While these studies did

not ascertain a direct interacting role for Ca<sup>2+</sup> with plant NOS-like enzyme, they provided physiological evidence that changes of [Ca<sup>2+</sup>]<sub>cyt</sub> might be involved intimately in mediating NO synthesis in plant cells and that NO appears as a step in the signalling cascade initiated by the cation.

### NO as a Ca<sup>2+</sup>-mobilizing agent

In animals, NO regulates Ca<sup>2+</sup> channel activities through different mechanisms: direct S-nitrosylation or indirect modulation via cGMP-dependent cascades (Fig. 1). S-nitrosylated Ca<sup>2+</sup> channels include voltage-gated Ca<sup>2+</sup> channels (P/Q- and L-type), CNGC, ryanodine receptors (RyR), and the N-methyl D-aspartate receptor (Clementi, 1998; Ahern *et al.*, 2002). For example, NO was reported to enhance the activity of type 1 RyR by S-nitrosylation of a single cysteine (Sun *et al.*, 2001). The NO-cGMP cascade modulates the activity of L-, T-, and N-type voltage-gated Ca<sup>2+</sup> channels, CNGC, inositol (1,4,5)-triphosphate receptor, and RyR (Clementi, 1998; Ahern *et al.*, 2002). Cyclic GMP targets Ca<sup>2+</sup> channels by virtue of their cyclic nucleotide binding sites (particularly in the case of CNGC) or mediates its effects through serine/threonine cGMP-dependent protein kinases (PKGs). It is especially noteworthy that protein sequences from practically every type of ion channel contain PKG consensus

phosphorylation sites (Ahern *et al.*, 2002). To add further to the complexity of this picture, in various cell types PKGs trigger the activation of RyR by promoting the synthesis of the nicotinamide adenine dinucleotide (NAD<sup>+</sup>) metabolite cyclic ADP ribose (Fig. 1). Furthermore, NO also decreases [Ca<sup>2+</sup>]<sub>cyt</sub> by activating plasma membrane and endomembrane Ca<sup>2+</sup> transporters (Clementi, 1998; Fig. 1). The detailed mechanism of this action is still unclear and might involve both nitrosylation and cGMP-dependent processes (see, for instance, Yao and Huang, 2003). Because cNOSs activity is strictly Ca<sup>2+</sup>-dependent, the finding discussed above also indicates that NO exerts a positive or a negative feedback control of its own production by promoting activation or inhibition of Ca<sup>2+</sup>-channels and Ca<sup>2+</sup> transporters, respectively.

The first arguments that Ca<sup>2+</sup> might participate downstream of NO in plant signal transduction pathways were provided by Durner *et al.* (1998) and Klessig *et al.* (2000). These authors showed that the cADPR antagonist 8-bromo-cADPR reduces and delays NO-induced accumulation of *PR* (*Pathogenesis-Related*)-1 transcripts in tobacco leaves. Accordingly, cADPR itself caused substantial *PR*-1 expression through a mechanism sensitive to RyR inhibitors. This set of observations provided evidence that the dynamic regulation of plant gene expression by NO could take place via a NO-cADPR-Ca<sup>2+</sup>

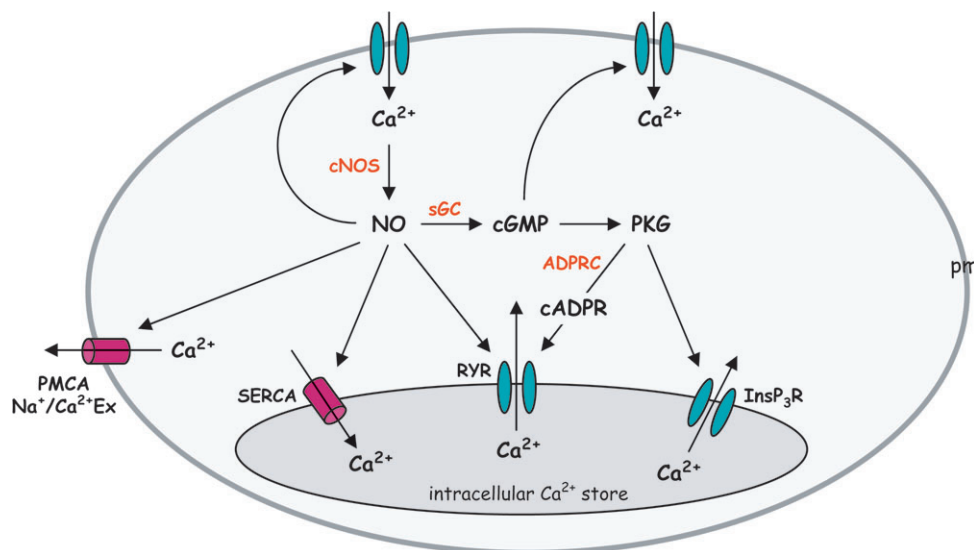

**Fig. 1.** NO-based Ca<sup>2+</sup> signalling in animal cells. The Ca<sup>2+</sup> channels shown in the plasma membrane (pm) are representative of voltage-gated Ca<sup>2+</sup> channels, cyclic-nucleotide-gated channels (CNGCs) and of the N-methyl D-aspartate (NMDA) receptor. NO, produced by the Ca<sup>2+</sup>/CaM-dependent constitutive NOSs (cNOSs), generates Ca<sup>2+</sup> signals via several routes (not all pathways occur necessarily in the same cell). First, NO regulates plasma membrane and endomembrane Ca<sup>2+</sup> channels through direct S-nitrosylation of critical cysteines, leading to activation (P/Q- and L-type voltage-gated channels, CNGCs, RyRs) or inhibition (NMDA receptor, L-type voltage-gated channels) of the channels. Second, NO promotes cGMP synthesis by nitrosylation of the soluble guanylate cyclase (sGC). In turn, cGMP activates cGMP-dependent protein kinases (PKGs) and CNGCs through its binding to cyclic-nucleotide binding sites. cGMP might also regulate L-, T- and N-type voltage-gated channels indirectly (both activation and/or inhibition have been reported). Depending on the cell type and the initial stimulus, PKGs inhibit (most frequent situation) or activate the inositol (1,4,5)-triphosphate receptor (InsP<sub>3</sub>R) via phosphorylation. PKGs might also activate ADP-ribosyl cyclase (ADPRC) by phosphorylation. ADPRC catalyses the cyclization of NAD to cADPR, an endogenous ligand for RyR. Finally, NO contributes to the overall cytosolic Ca<sup>2+</sup> homeostasis through the positive regulation of Ca<sup>2+</sup> transporters including Na<sup>+</sup>/Ca<sup>2+</sup> exchanger (Na<sup>+</sup>/Ca<sup>2+</sup> Ex) and plasma membrane and sarcoplasmic-endoplasmic reticulum Ca<sup>2+</sup>-ATPases (PMCA and SERCA, respectively).

cascade. Subsequent studies have partly reinforced this conclusion. First, artificially generated NO has been reported to raise  $[Ca^{2+}]_{cyt}$  of *Vicia faba* guard cells by promoting  $Ca^{2+}$  release from intracellular stores (Garcia-Mata *et al.*, 2003). The rise in  $[Ca^{2+}]_{cyt}$  was blocked by sGC and RYR inhibitors, establishing cGMP as a putative mediator for NO-induced activation of cADPR-dependent endomembrane  $Ca^{2+}$  channels. A similar situation was found by analysing the effects of the non-thiol NO donor DEA-NONOate in tobacco cell suspensions expressing the  $Ca^{2+}$  reporter apoaequorin in the cytosol (Lamotte *et al.*, 2004, 2006). Here too, NO markedly enhanced the  $[Ca^{2+}]_{cyt}$  through a process sensitive to 8-bromo-cADPR, indicating that NO-induced  $Ca^{2+}$  mobilization operates predominantly via a cADPR-mediated  $Ca^{2+}$ -release mechanism. Interestingly, these latter studies also pointed to a role for NO in modulating plasma membrane  $Ca^{2+}$ -permeable channels. Indeed, NO released by DEA-NONOate was found to trigger a fast and transient influx of extracellular  $Ca^{2+}$  in tobacco cells. Because the NO-evoked  $Ca^{2+}$  influx occurred concomitantly with a  $Ca^{2+}$ -independent plasma membrane depolarization, it was assumed that NO may promote the opening of voltage-gated  $Ca^{2+}$  channels subsequent to membrane depolarization (Lamotte *et al.*, 2006). At present, however, the exact mechanisms of NO-induced plasma membrane depolarization remain to be elucidated. Recent work has suggested that NO might modulate plasma membrane  $Ca^{2+}$ -permeable channels by showing that NO negatively regulates  $Ca^{2+}$  entry in grapevine cells challenged by the elicitor endopolygalacturonase 1 (Vandelle *et al.*, 2006). This finding is of particular interest because it expands the role of NO in plant signalling as a more general regulator of  $Ca^{2+}$  homeostasis, promoting both activation and/or inhibition of  $Ca^{2+}$  fluxes. As reported in endothelial cells or neurons, a negative feedback could serve to protect cells from the detrimental effects of excessive NO and  $Ca^{2+}$  (see, for instance, Yao and Huang, 2003). Finally, it should be mentioned that artificially generated NO did not evoke rises in nuclear free  $Ca^{2+}$  concentration in tobacco cell suspensions expressing apoaequorin in the nucleus (Lecourieux *et al.*, 2005). Therefore, NO action on  $Ca^{2+}$  homeostasis might be restricted to specific cellular compartments.

Although these studies support a possible link between NO, cADPR, cGMP, and  $Ca^{2+}$ , a note of caution is required. First of all, it remains to be seen whether the level of cADPR changes in response to NO-dependent processes. Second, while the ability of NO to induce cGMP synthesis in plant cells is well established (Durner *et al.*, 1998; Hu *et al.*, 2005), the plant NO-sensitive sGC-like enzyme is unknown. Finally, although several investigators have reported the requirement of phosphorylation-dependent events in the mediation of NO-induced  $Ca^{2+}$  mobilization (Sokolovski *et al.*, 2005; Lamotte *et al.*, 2006), plant PKGs have not yet been identified. Therefore,

at this stage of knowledge, the conclusion that the NO signalling pathway leading to  $Ca^{2+}$  mobilization in plants is similar to that defined in animals remains speculative.

Several studies supportive of a potential role for NO as an endogenous regulator of  $Ca^{2+}$  mobilization in physiological contexts have been reported. Notably, it has been shown that NO contributes to  $[Ca^{2+}]_{cyt}$  increases in plant cells exposed to biotic and abiotic stresses including hyper-osmotic stresses and elicitors of defence responses (Gould *et al.*, 2003; Lamotte *et al.*, 2004, 2006; Vandelle *et al.*, 2006). For example, a specific role for NO in activating intracellular  $Ca^{2+}$  channels was assumed through pharmacological and biochemical approaches in tobacco and grapevine cells exposed to the elicitors cryptogein and endopolygalacturonase 1, respectively (Lamotte *et al.*, 2004; Vandelle *et al.*, 2006). Furthermore, pharmacological experiments suggested that NO is active upstream of  $[Ca^{2+}]_{cyt}$  transients during the processes of ABA-induced stomatal closure and auxin-induced adventitious root formation (Desikan *et al.*, 2002; Lanteri *et al.*, 2006).

These studies also raise the question of how the NO-mediated  $Ca^{2+}$  fluxes are propagated downstream into cellular responses. Clearly, this aspect has been poorly investigated. However, it is likely that protein kinases might represent an important pathway by which NO-dependent  $Ca^{2+}$  signals are decoded. Recently, a 50 kDa CDPK, the activity of which was induced by NO through a  $Ca^{2+}$ -dependent process, was characterized in cucumber explants (Lanteri *et al.*, 2006). The 50 kDa CDPK might contribute to NO-induced adventitious root formation. Likewise, in our laboratory, evidence was obtained that the activation of the tobacco MAPK SIPK (Salicylic acid-Induced Protein Kinase) by NO donors (Klessig *et al.*, 2000) requires a transient influx of extracellular  $Ca^{2+}$  in tobacco cells (C Courtois and D Wendehenne, unpublished data).

Another puzzling aspect to discuss here is the cellular impact of the NO/ $Ca^{2+}$  pathway. Here too, the first hypotheses have only just begun to emerge. First, a rise in  $[Ca^{2+}]_{cyt}$  may serve to initiate but also to amplify and/or maintain NO production. Accordingly, Lamotte *et al.* (2004) showed that addition of inhibitors of plasma membrane  $Ca^{2+}$ -permeable channels in the mid-course of cryptogein-induced NO synthesis in tobacco cell suspensions suppressed NO production within minutes. Second, by elevating  $[Ca^{2+}]_{cyt}$ , NO might influence indirectly the activity of proteins including protein kinases (see above) and  $Ca^{2+}$ -sensitive  $K^+$  and  $Cl^-$  channels as described in guard cells (Garcia-Mata *et al.*, 2003). Third, based on animal studies (see, for instance, Peunova and Enikolopov, 1993) and the data discussed above, it is reasonable to speculate that NO/ $Ca^{2+}$  pathways, as well as the combined action of NO and  $Ca^{2+}$ , might modulate the transcriptional regulation of specific set of genes involved, for

instance, in disease resistance or developmental processes. Finally, it seems plausible that interplays of NO and Ca<sup>2+</sup> might be implicated in cell death. This idea is supported by the fact that both NO and Ca<sup>2+</sup> are triggers and modulators of cell death (Lam, 2004; Delledonne, 2005). This hypothesis is further reinforced by the finding that H<sub>2</sub>O<sub>2</sub>, which acts in concert with NO in triggering cell death (Delledonne *et al.*, 2001; Zago *et al.*, 2006), also contributes to stimulus-induced [Ca<sup>2+</sup>]<sub>cyt</sub> changes (Garcia-Brugger *et al.*, 2006; Lecourieux *et al.*, 2006). Mechanistically, Ca<sup>2+</sup> might represent a signalling carrier of NO and/or H<sub>2</sub>O<sub>2</sub>-triggered cell death pathways or, as described in animal cells, cell death could also be related to the cellular Ca<sup>2+</sup> overload or perturbation of intracellular compartmentalization resulting from NO- and/or H<sub>2</sub>O<sub>2</sub>-induced Ca<sup>2+</sup> fluxes (Orrenius *et al.*, 2003). Therefore, understanding of the mechanisms underlying cell death should also include experiments designed to delineate the cross-talk between Ca<sup>2+</sup>, NO, and H<sub>2</sub>O<sub>2</sub> in further detail.

### Protein kinases as targets for NO action

In animal cells, NO modulates the activity of distinct classes of protein kinases that play a key role in signal transduction, including MAPK cascades, protein kinase C, and Janus kinases (Beck *et al.*, 1999). Furthermore, kinases related to primary metabolism such as pyruvate kinase were reported to be activated or inhibited by S-nitrosylation (Gao *et al.*, 2005). In plants, the possibility that NO might influence protein kinase activities has been poorly explored and most of the available data come from studies based on artificially generated NO. NO-dependent activation of protein kinases exhibiting, for instance, MAPK or CDPK properties were reported in *A. thaliana* suspension cell cultures and roots (Clarke *et al.*, 2000; Capone *et al.*, 2004), cucumber explants (Pagnussat *et al.*, 2004; Lanteri *et al.*, 2006) and tobacco leaves and suspension cell cultures (Klessig *et al.*, 2000; Yamamoto *et al.*, 2004). With the exception of SIPK (Klessig *et al.*, 2000), none of these protein kinases has been identified. Furthermore, the NO donor SNP was shown to increase the amount and histone H1 phosphorylating activity of the p34<sup>cdc2</sup> cyclin-dependent kinase in auxin-treated alfalfa protoplasts (Ötvös *et al.*, 2005). The NO-induced activation of these kinases has been thought to be part of processes related to defence responses and/or cell death (Clarke *et al.*, 2000; Klessig *et al.*, 2000; Yamamoto *et al.*, 2004) and to auxin-mediated adventitious root formation and cell division (Pagnussat *et al.*, 2004; Ötvös *et al.*, 2005; Lanteri *et al.*, 2006). Finally, it should be mentioned that several kinases including phosphoglycerate kinase, nucleoside diphosphate kinase, and adenosine kinase have been shown to be S-nitrosylated *in vitro*

(Lindermayr *et al.*, 2005). The biological relevance of the S-nitrosylation of these kinases has not yet been defined.

The first evidence that NO modulates the activation of a member of the plant SNF1-related protein kinase 2 (SnRK2) subfamily has been reported recently (Lamotte *et al.*, 2006). Plant SnRKs are classified into three subfamilies: SnRK1, SnRK2, and SnRK3, the SnRK2 and SnRK3 subfamilies being specific to plants (Harmon, 2003). Members of the SnRK2 subfamily function in abiotic stress signalling and include the tobacco 42 kDa protein kinase NtOSAK (*Nicotiana tabacum* Osmotic Stress-Activated Protein Kinase; Mikolajczyk *et al.*, 2000). NtOSAK is activated very rapidly in response to osmotic stress through phosphorylation of two serine residues (154 and 158) located within the enzyme activation loop (Burza *et al.*, 2006). In our laboratory, it has been demonstrated that the NO donor DEA/NONOate induced a fast and transient activation of NtOSAK in tobacco suspension cell cultures (Lamotte *et al.*, 2006). Furthermore, evidence has been provided that NO might be a key component of the hyperosmotic stress-induced signalling cascade leading to NtOSAK activation. An attempt was also made to clarify the NO-dependent upstream pathway of NtOSAK activation. Initial data established that neither NO-mediated Ca<sup>2+</sup> influx nor Ca<sup>2+</sup> release from internal stores were required for NtOSAK activation (Lamotte *et al.*, 2006). Among the other possibilities, NtOSAK activity might be up-regulated through phosphorylation by an upstream NO-dependent protein kinase, by auto-phosphorylation, and/or through direct S-nitrosylation or nitration by NO-derived species. Preliminary experiments are not in favour of the last possibility.

The question that further comes to mind is the incidence of the NO/NtOSAK pathway on the cell response. Protein kinases of the SnRK2 subfamily are activated by osmolytes and some of them by ABA as well, highlighting a role for these enzymes in a general response to osmotic stress (Boudsocq *et al.*, 2004; Kobayashi *et al.*, 2004). The SnRK2 kinases present in guard cells, AAPK (ABA-Activated Protein Kinase) from *Vicia faba* and its *Arabidopsis* orthologue SnRK2.6/OST1/SRK2E play an important role in ABA signalling in response to drought and regulate stomata closure under low humidity stress (Li *et al.*, 2000; Mustilli *et al.*, 2002; Yoshida *et al.*, 2002). It has been shown that the other *Arabidopsis* ABA-dependent SnRK2 kinase, SRK2C/SnRK2.8, improves plant drought tolerance, probably by promoting the up-regulation of stress-responsive genes expression, including *DREB1A/CBF3* encoding a transcription factor that broadly regulates stress-responsive genes (Umezawa *et al.*, 2004). Several lines of evidence indicate that SnRK2 kinases can also phosphorylate and, in this way, activate transcription activators AREB1 and TRAB1 in *Arabidopsis* and rice, respectively (Kobayashi *et al.*, 2005; Furihata *et al.*, 2006). These data strongly suggest that

SnRK2 protein kinases are involved in the regulation of expression of ABA-responsive genes. Based on these studies, it is plausible that plant cells challenged by osmotic stress might use NO as an early signalling compound acting upstream of SnRK2-induced pathways. This could be true for other plant responses in which both changes in osmotic pressure and NO production are observed, such as responses to pathogens or elicitors of defence responses (Lamotte *et al.*, 2004; Gauthier *et al.*, 2007). Regarding this aspect, it has recently been shown that *Arabidopsis* OST1 kinase and NO production are required in the plant innate immunity against bacterial invasion (Melotto *et al.*, 2006). However, the involvement of NO in OST1 activation was not investigated. Here again, future work will have to clarify this possibility, but the findings so far are certainly promising.

## Conclusion

The field of nitric oxide in plant biology was born almost ten years ago, when it was first revealed that this free radical gas is involved in defence responses (Delledonne

*et al.*, 1998; Durner *et al.*, 1998). Since that time, NO has been shown to function as an ubiquitous molecule with diverse physiological roles. Although much has been learnt about NO, several issues concerning its action remain outstanding. As discussed above, mechanisms through which it might affect transduction processes imply the regulation of key signalling proteins such as protein kinases and  $\text{Ca}^{2+}$ -permeable channels as well as the mobilization of second messengers including  $\text{Ca}^{2+}$ , cGMP, and cADPR (Fig. 2). However, little is known at the molecular level concerning these signalling proteins and important goals are to identify them and to investigate how NO modulates their activities. Furthermore, it is necessary to define the physiological relevance of these modulations and to understand how interplays between NO and  $\text{Ca}^{2+}$  guide the cell toward a specific response. Such tasks will require functional analysis of the molecular mechanisms that relay NO-dependent  $\text{Ca}^{2+}$  signals. Finally, it should be kept in mind that pharmacological evidence for cADPR involvement in mediating NO-induced  $\text{Ca}^{2+}$  mobilization has been obtained, but the direct measurement of cellular cADPR levels is urgently

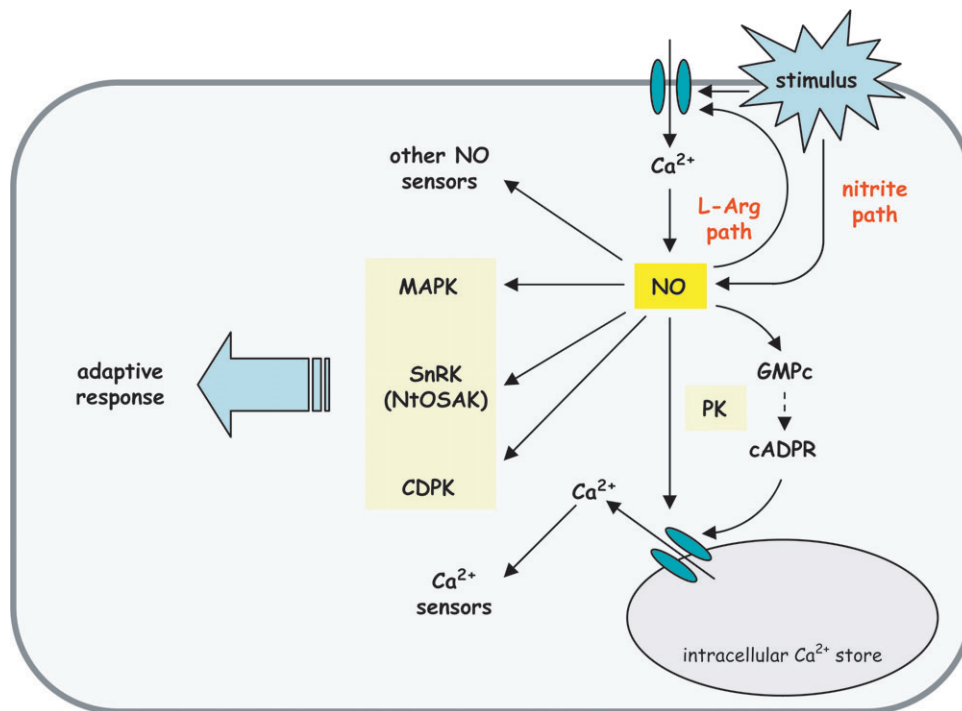

**Fig. 2.** Interplays between NO,  $\text{Ca}^{2+}$  and protein kinases in plant cells. NO production occurs through two enzymatic routes: a nitrite-dependent and a L-arginine (L-arg) route. The L-arginine-dependent pathway is up-regulated by upstream  $\text{Ca}^{2+}$  fluxes which might be partly mediated by CNGCs. The increases in  $[\text{Ca}^{2+}]_{\text{cyt}}$  caused by NO are due to extracellular  $\text{Ca}^{2+}$  uptakes and/or mobilization of intracellular  $\text{Ca}^{2+}$ . Mechanisms through which NO mobilizes intracellular  $\text{Ca}^{2+}$  might involve cADPR, cGMP, and phosphorylation-dependent processes. The NO/ $\text{Ca}^{2+}$  information seem to be partly processed by CDPKs and MAPKs. In tobacco, NO-sensor protein kinases include NtOSAK, a member of the SnRK2 subfamily activated in response to osmotic stress. Other NO sensors correspond to nitrosylated proteins. The cross-talks operating between NO,  $\text{Ca}^{2+}$ , and protein kinases in plant cells exposed to biotic and abiotic stimuli (including auxin, ABA, osmotic stress, pathogens, and elicitors of defence responses) might have important functional implications such as the dynamic regulation of gene expression. As described in animal cells, NO might also display a dual role in controlling  $[\text{Ca}^{2+}]_{\text{cyt}}$  concentration since both NO-dependent activation and inhibition of extracellular  $\text{Ca}^{2+}$  uptakes are reported. PK: protein kinases.

required. Although in its infancy, research into the signalling functions of NO in plants is advancing rapidly and there should soon be a much better understanding of this most unusual signalling agent.

## Acknowledgements

Studies by the authors were supported by the Conseil Régional de Bourgogne, the Ministère de l'Éducation Nationale, de la Recherche et de la Technologie, the Institut National de la Recherche Agronomique, the Ministère des Affaires Étrangères (EGIDE Polonium, grant 11545WG), and the Polish Ministry of Education and Science (grant PBZ-KBN-110/PO4/2004).

## References

- Ahern GP, Klyachko VA, Jackson MB. 2002. cGMP and S-nitrosylation: two routes for modulation of neuronal excitability by NO. *Trends in Neuroscience* **25**, 510–517.
- Ali R, Ma W, Lemtiri-Chlieh F, Tsaltas D, Leng Q, von Bodman S, Berkowitz GA. 2007. Death don't have no mercy and neither does calcium: *Arabidopsis* CYCLIC NUCLEOTIDE GATED CHANNEL2 and innate immunity. *The Plant Cell* **19**, 1081–1095.
- Allen AE, Vardi A, Bowler C. 2006. An ecological and evolutionary context for integrated nitrogen metabolism and related signalling pathways in marine diatoms. *Current Opinion in Plant Biology* **9**, 264–273.
- Beck KF, Eberhardt W, Frank S, Huwiler A, Messmer UK, Mühl H, Pfeilschifter J. 1999. Inducible NO synthase: role in cellular signalling. *Journal of Experimental Biology* **202**, 645–653.
- Belenghi B, Romero-Puertas MC, Vercammen D, Brackener A, Inzé D, Delledonne M, Van Breusegem F. 2007. Metacaspase activity of *Arabidopsis thaliana* is regulated by S-nitrosylation of a critical cysteine residue. *Journal of Biological Chemistry* **282**, 1352–1358.
- Berridge MJ, Bootman MD, Roderick HL. 2003. Calcium signalling: dynamics, homeostasis and remodelling. *Nature Reviews Molecular Cell Biology* **4**, 517–529.
- Bogdan C. 2001. Nitric oxide and the regulation of gene expression. *Trends in Cell Biology* **11**, 66–75.
- Bogdan C, Rölinghoff M, Diefenbach A. 2000. Reactive oxygen and reactive nitrogen intermediates in innate and specific immunity. *Current Opinion in Immunology* **12**, 64–76.
- Boudsocq M, Barbier-Brygoo H, Lauriere C. 2004. Identification of nine SNF1-related protein kinase 2 activated by hyperosmotic and saline stresses in *Arabidopsis thaliana*. *Journal of Biological Chemistry* **279**, 41758–41766.
- Bright J, Desikan R, Hancock JT, Weir IS, Neill SJ. 2006. ABA-induced NO generation and stomatal closure in *Arabidopsis* are dependent on H<sub>2</sub>O<sub>2</sub> synthesis. *The Plant Journal* **45**, 113–122.
- Burza AM, Pekala I, Sikora J, Siedlecki P, Malagocki P, Bucholc M, Koper L, Zielenkiewicz P, Dadlez M, Dobrowolska G. 2006. *Nicotiana tabacum* osmotic stress-activated kinase is regulated by phosphorylation on Ser-154 and Ser-158 in the kinase activation loop. *The Journal of Biological Chemistry* **281**, 34299–34311.
- Capone R, Tiwari BS, Levine A. 2004. Rapid transmission of oxidative and nitrosative stress signals from roots to shoots in *Arabidopsis*. *Plant Physiology and Biochemistry* **42**, 425–428.
- Clarke A, Desikan R, Hurst RD, Hancock JT, Neill SJ. 2000. NO way back: nitric oxide and programmed cell death in *Arabidopsis thaliana* suspension cultures. *The Plant Journal* **24**, 667–677.
- Clementi E. 1998. Role of nitric oxide and its intracellular signalling pathways in the control of Ca<sup>2+</sup> homeostasis. *Biochemical Pharmacology* **55**, 713–718.
- Corpas FJ, Barroso JB, Carreras A, et al. 2004. Cellular and subcellular localization of endogenous nitric oxide in young and senescent pea plants. *Plant Physiology* **136**, 2722–2733.
- Corpas FJ, Barroso JB, Carreras A, Valderrama R, Palma JM, Leon AM, Sandalio LM, del Rio LA. 2006. Constitutive arginine-dependent nitric oxide synthase activity in different organs of pea seedlings during plant development. *Planta* **224**, 246–254.
- Crawford NM. 2006. Mechanisms for nitric oxide synthesis in plants. *Journal of Experimental Botany* **57**, 471–478.
- Crawford NM, Galli M, Tischner R, Heimer YM, Okamoto M, Mack A. 2006. Response to Zemojtel *et al*: plant nitric oxide synthase: back to square one. *Trends in Plant Science* **11**, 526–527.
- Delledonne M. 2005. NO news is good news for plants. *Current Opinion in Plant Biology* **8**, 390–396.
- Delledonne M, Xia Y, Dixon RA, Lamb C. 1998. Nitric oxide functions as a signal in plant disease resistance. *Nature* **394**, 585–588.
- Delledonne M, Zeier J, Marocco A, Lamb C. 2001. Signal interactions between nitric oxide and reactive oxygen intermediates in the plant hypersensitive disease resistance response. *Proceedings of the National Academy of Sciences, USA* **98**, 13454–13459.
- del Rio LA, Corpas FJ, Barroso JB. 2004. Nitric oxide and nitric oxide synthase activity in plants. *Phytochemistry* **65**, 783–792.
- Desikan R, Griffiths R, Hancock J, Neill S. 2002. A new role for an old enzyme: nitrate reductase-mediated nitric oxide generation is required for abscisic acid-induced stomatal closure in *Arabidopsis thaliana*. *Proceedings of the National Academy of Sciences, USA* **99**, 16314–16318.
- Durner J, Wendehenne D, Klessig DF. 1998. Defense genes induction in tobacco by nitric oxide, cyclic GMP and cyclic ADP ribose. *Proceedings of the National Academy of Sciences, USA* **95**, 10328–10333.
- Furihata T, Maruyama K, Fujita Y, Umezawa T, Yoshida R, Shinozaki K, Yamaguchi-Shinozaki K. 2006. Abscisic acid-dependent multisite phosphorylation regulates the activity of a transcription activator AREB1. *Proceedings of the National Academy of Sciences, USA* **103**, 1988–1993.
- Gao C, Guo H, Wei J, Mi Z, Wai PY, Kuo PC. 2005. Identification of S-nitrosylated proteins in endotoxin-stimulated RAW264.7 murine macrophages. *Nitric Oxide* **12**, 121–126.
- Garcia-Brugger A, Lamotte O, Vandelle E, Bourque S, Lecourieux D, Poinssot B, Wendehenne D, Pugin A. 2006. Early signalling events induced by elicitors of plant defenses. *Molecular Plant–Microbe Interaction* **19**, 711–724.
- Garcia-Mata C, Gay R, Sokolowski S, Hills A, Lamattina L, Blatt MR. 2003. Nitric oxide regulates K<sup>+</sup> and Cl<sup>-</sup> channels in guard cells through a subset of abscisic acid-evoked signalling pathways. *Proceedings of the National Academy of Sciences, USA* **100**, 11116–11121.
- Gauthier A, Lamotte O, Rebutier D, Bouteau F, Pugin A, Wendehenne D. 2007. Nitrate efflux is an early prerequisite to morphological and biochemical events participating to cryptogam-induced cell death. *Plant Signalling and Behavior* **2**, 89–98.
- Gould KS, Lamotte O, Klinguer A, Pugin A, Wendehenne D. 2003. Nitric oxide production in tobacco leaf cells: a generalized stress response? *Plant, Cell and Environment* **26**, 1851–1862.

- Grun S, Lindermayr C, Sell S, Durner J. 2006. Nitric oxide and gene regulation in plants. *Journal of Experimental Botany* **57**, 507–516.
- Guo FQ, Okamoto M, Crawford NM. 2003. Identification of a plant nitric oxide synthase gene involved in hormonal signalling. *Science* **302**, 100–103.
- Hanafy KA, Krumenacker JS, Murad F. 2001. NO, nitrotyrosine, and cyclic GMP in signal transduction. *Medical Science Monitoring* **7**, 801–819.
- Harmon AC. 2003. Calcium-regulated protein kinases of plants. *Gravitational and Space Biology Bulletin* **16**, 83–90.
- Hess DT, Matsumoto A, Kim SO, Marshall HE, Stamler JS. 2005. Protein S-nitrosylation: purview and parameters. *Nature Reviews Molecular Cell Biology* **6**, 150–166.
- Hu X, Neill S, Tang Z, Cai W. 2005. Nitric oxide mediates gravitropic bending in soybean roots. *Plant Physiology* **137**, 663–670.
- Klessig DF, Durner J, Noad R, et al. 2000. Nitric oxide and salicylic acid signalling in plant defense. *Proceedings of the National Academy of Sciences, USA* **97**, 8849–8855.
- Kobayashi Y, Yamamoto S, Minami H, Kagaya Y, Hattori T. 2004. Differential activation of the rice sucrose nonfermenting 1-related protein kinase2 family by hyperosmotic stress and abscisic acid. *The Plant Cell* **16**, 1163–1177.
- Kobayashi Y, Murata M, Minami H, Yamamoto S, Kagaya Y, Hobo T, Yamamoto A, Hattori T. 2005. Abscisic acid-activated SNRK2 protein kinases function in the gene regulation pathway of ABA signal transduction by phosphorylating ABA response element-binding factors. *The Plant Journal* **44**, 939–949.
- Kone BC, Kuncewicz T, Zhang W, Yu ZY. 2003. Protein interactions with nitric oxide synthases: controlling the right time, the right place, and the right amount of nitric oxide. *American Journal of Renal Physiology* **285**, 178–190.
- Lam E. 2004. Controlled cell death, plant survival and development. *Nature Molecular and Cell Biology* **5**, 305–315.
- Lamattina L, Garcia-Mata C, Graziano M, Pagnussat G. 2003. Nitric oxide: the versatility of an extensive signal molecule. *Annual Review of Plant Biology* **54**, 109–136.
- Lamotte O, Gould K, Lecourieux D, Sequeira-Legrand A, Lebrun-Garcia A, Durner J, Pugin A, Wendehenne D. 2004. Analysis of nitric oxide signalling functions in tobacco cells challenged by the elicitor cryptogein. *Plant Physiology* **135**, 516–529.
- Lamotte O, Courtois C, Barnavon L, Pugin A, Wendehenne D. 2005. Nitric oxide in plants: the biosynthesis and cell signalling properties of a fascinating molecule. *Planta* **221**, 1–4.
- Lamotte O, Courtois C, Dobrowolska G, Besson A, Pugin A, Wendehenne D. 2006. Mechanisms of nitric oxide-induced increase of free cytosolic Ca<sup>2+</sup> concentration in *Nicotiana glauca* cells. *Free Radical Biology and Medicine* **40**, 1369–1376.
- Lanteri M, Pagnussat GC, Lamattina L. 2006. Calcium and calcium-dependent protein kinases are involved in nitric oxide- and auxin-induced adventitious root formation in cucumber. *Journal of Experimental Botany* **57**, 1341–1351.
- Lecourieux D, Lamotte O, Bourque S, Mazars C, Wendehenne D, Ranjeva R, Pugin A. 2005. Elicitors induce specific changes in nuclear free calcium in tobacco cell suspensions. *Cell Calcium* **38**, 527–538.
- Lecourieux D, Ranjeva R, Pugin A. 2006. Calcium in plant defence-signalling pathways. *New Phytologist* **171**, 249–269.
- Li J, Wang XQ, Watson MB, Assmann SM. 2000. Regulation of abscisic acid-induced stomatal closure and anion channels by guard cell AAPK kinase. *Science* **287**, 300–303.
- Lindermayr C, Saalbach G, Bahnweg G, Durner J. 2006. Differential inhibition of *Arabidopsis* methionine adenosyltransferase by protein S-nitrosylation. *Journal of Biological Chemistry* **281**, 4285–4291.
- Lindermayr C, Saalbach G, Durner J. 2005. Proteomic identification of S-nitrosylated proteins in *Arabidopsis*. *Plant Physiology* **137**, 921–930.
- Lum HK, Butt YK, Lo SC. 2002. Hydrogen peroxide induces a rapid production of nitric oxide in mung bean (*Phaseolus aureus*). *Nitric Oxide* **6**, 205–213.
- Mannick JB, Schonhoff CM. 2002. Nitrosylation: the next phosphorylation? *Archives of Biochemistry and Biophysics* **408**, 1–6.
- Melotto M, Undrewood W, Koczan J, Nomura K, He SY. 2006. Plant stomata function in innate immunity against bacterial invasion. *Cell* **126**, 969–980.
- Meyer C, Lea US, Provan F, Kaiser WM, Lillo C. 2005. Is nitrate reductase a major player in the plant NO (nitric oxide) game? *Photosynthesis Research* **83**, 181–189.
- Mikolajczyk M, Awotunde OS, Muszynska G, Klessig DF, Dobrowolska G. 2000. Osmotic stress induces rapid activation of a salicylic acid-induced protein kinase and a homolog of protein kinase ASK1 in tobacco cells. *The Plant Cell* **12**, 165–178.
- Modolo LV, Cunha FQ, Braga MR, Salgado I. 2002. Nitric oxide synthase-mediated phytoalexin accumulation in soybean cotyledons in response to the *Diaporthe phaseolorum* f. sp. *meridionalis* elicitor. *Plant Physiology* **130**, 1288–1297.
- Modolo LV, Augusto O, Almeida IMG, Pinto-Maglio CAF, Oliveira HC, Seligman K, Salgado I. 2006. Decreased arginine and nitrite levels in nitrate reductase-deficient *Arabidopsis thaliana* plants impair nitric oxide synthesis and the hypersensitive response to *Pseudomonas syringae*. *Plant Science* **171**, 34–40.
- Mustilli AC, Merlot S, Vavasseur A, Frenzi F, Giraudat J. 2002. *Arabidopsis* OST1 protein kinase mediates the regulation of stomatal aperture by abscisic acid and acts upstream of reactive oxygen species production. *The Plant Cell* **14**, 3089–3099.
- Orrenius S, Zhivotovsky B, Nicotera P. 2003. Regulation of cell death: the calcium-apoptosis link. *Nature Molecular and Cell Biology* **4**, 552–565.
- Ötvös K, Pasternak TP, Miskolczi P, Domoki M, Dorjgotov D, Szücs A, Bottka S, Dudits D, Fehér A. 2005. Nitric oxide is required for, and promotes auxin-mediated activation of, cell division and embryogenic cell formation but does not influence cell cycle progression in alfalfa cell cultures. *The Plant Journal* **43**, 849–860.
- Pagnussat GC, Lanteri ML, Lombardo MC, Lamattina L. 2004. Nitric oxide mediates the indole acetic acid induction activation of a mitogen-activated protein kinase cascade involved in adventitious root development. *Plant Physiology* **135**, 279–286.
- Petersen OH, Michalak M, Verkhratsky A. 2005. Calcium signalling: past, present and future. *Cell Calcium* **38**, 161–169.
- Peunova N, Enikolopov G. 1993. Amplification of calcium-induced gene transcription by nitric oxide in neuronal cells. *Nature* **264**, 450–453.
- Sanders D, Pelloux J, Brownlee C, Harper JF. 2002. Calcium at the crossroads of signalling. *The Plant Cell* **14**, 401–417.
- Schmidt HHHW, Walter U. 1994. NO at work. *Cell* **78**, 919–925.
- Scruse-Field SA, Knight MR. 2003. Calcium: just a chemical switch? *Current Opinion in Plant Biology* **6**, 500–506.
- Sokolovski S, Hills A, Gay R, Garcia-Mata C, Lamattina L, Blatt MR. 2005. Protein phosphorylation is a prerequisite for intracellular Ca<sup>2+</sup> release and ion channel control by nitric oxide and abscisic acid in guard cells. *The Plant Journal* **43**, 520–529.
- Stamler JS, Lamas S, Fang FC. 2001. Nitrosylation: the prototypic redox-based signalling mechanism. *Cell* **106**, 675–678.



- Stöhr C, Strube F, Marx G, Ullrich WR, Rockel P.** 2001. A plasma membrane-bound enzyme of tobacco roots catalyses the formation of nitric oxide from nitrite. *Planta* **212**, 835–841.
- Sun J, Xin C, Eu JP, Stamler JS, Meissner G.** 2001. Cysteine-3635 is responsible for skeletal muscle ryanodine receptor modulation by NO. *Proceedings of the National Academy of Sciences, USA* **98**, 11158–11162.
- Umezawa T, Yoshida R, Maruyama K, Yamaguchi-Shinozaki K, Shinozaki K.** 2004. SRK2C, a SNF1-related protein kinase 2, improves drought tolerance by controlling stress-responsive gene expression in *Arabidopsis thaliana*. *Proceedings of the National Academy of Sciences, USA* **101**, 17306–17311.
- Vandelle E, Poinsot B, Wendehenne D, Bentejac M, Pugin A.** 2006. Integrated signalling network involving calcium, nitric oxide, active oxygen species but not mitogen-activated protein kinases in BcPG1-elicited grapevine defenses. *Molecular Plant–Microbe Interaction* **19**, 429–440.
- Wendehenne D, Durner J, Klessig DF.** 2004. Nitric oxide: a new player in plant signalling and defence responses. *Current Opinion in Plant Biology* **7**, 449–455.
- Willmott N, Sethi JK, Walseth TF, Lee H, White AM, Galione A.** 1996. Nitric oxide-induced mobilization of intracellular calcium via the cyclic ADP-ribose signalling pathway. *Journal of Biological Chemistry* **271**, 3699–3705.
- Yamamoto A, Katou S, Yoshioka H, Doke N, Kawakita K.** 2004. Involvement of nitric oxide generation in hypersensitive cell death induced by elicitor in tobacco cell suspension culture. *Journal of General Plant Pathology* **70**, 85–92.
- Yamasaki H, Sakihama Y, Takahashi S.** 1999. An alternative pathway for nitric oxide production in plants: new features of an old enzyme. *Trends in Plant Science* **4**, 128–129.
- Yao X, Huang Y.** 2003. From nitric oxide to endothelial cytosolic Ca<sup>2+</sup>: a negative feedback control. *Trends in Pharmacological Sciences* **24**, 262–266.
- Yoshida R, Hobo T, Ichimura K, Mizoguchi T, Takahashi F, Aronso J, Ecker JR, Shinozaki K.** 2002. ABA-activated SnRK2 protein kinase is required for dehydration stress signaling in *Arabidopsis*. *Plant Cell Physiology* **43**, 1473–1483.
- Zago E, Morsa S, Dat JF, Alard P, Ferrarini A, Inzé D, Delledonne M, Van Breusegem F.** 2006. Nitric oxide- and hydrogen peroxide-responsive gene regulation during cell death induction in tobacco. *Plant Physiology* **141**, 404–411.
- Zemojtel T, Frohlich A, Palmieri MC, et al.** 2006. Plant nitric oxide synthase: a never-ending story? *Trends in Plant Science* **11**, 524–525.
- Zottini M, Costa A, De Michele R, Ruzzenz M, Carimi F, Lo Schiavo F.** 2007. Salicylic acid activates nitric oxide synthesis in *Arabidopsis*. *Journal of Experimental Botany* **58**, 1397–1405.
